# Supplementary material for: Regulatory dynamics of 11p13 suggest a role for EHF in modifying CF lung disease severity
Source: PubMed Central journal article supplement — Nucleic Acids Res. 2017 May 26;45(15):8773–84. doi: 10.1093/nar/gkx482 (PMC5587731; doi:10.1093/nar/gkx482), 2017-05-26
Supplement: gkx482_Supp.pdf [file gkx482_Supp.pdf]

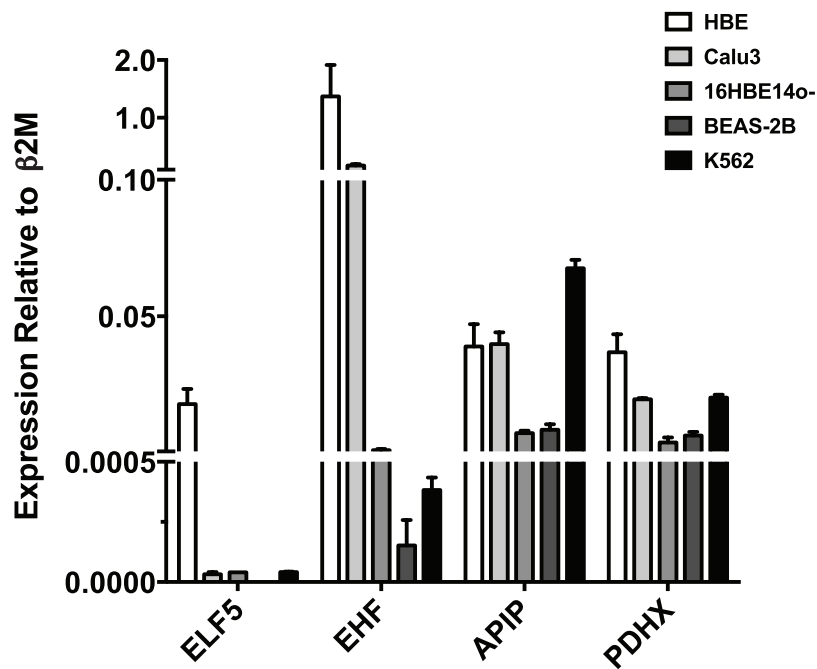

**Suppl. Fig. 2. Relative expression levels of 11p13 genes in different cell types.** The expression of *ELF5*, *EHF*, *APIP*, and *PDHX* was quantified using SYBR Green qPCR assays and analyzed relative to  $\beta$ -2-microglobulin ( $\beta$ 2M) levels. Data are shown for primary HBE (white), Calu3 (light grey), 16HBE14o- (medium grey), BEAS-2B (dark grey), and K562 (black) cells. For HBE samples, three different donor codes were assayed twice each (n=3). For cell lines, n=2.

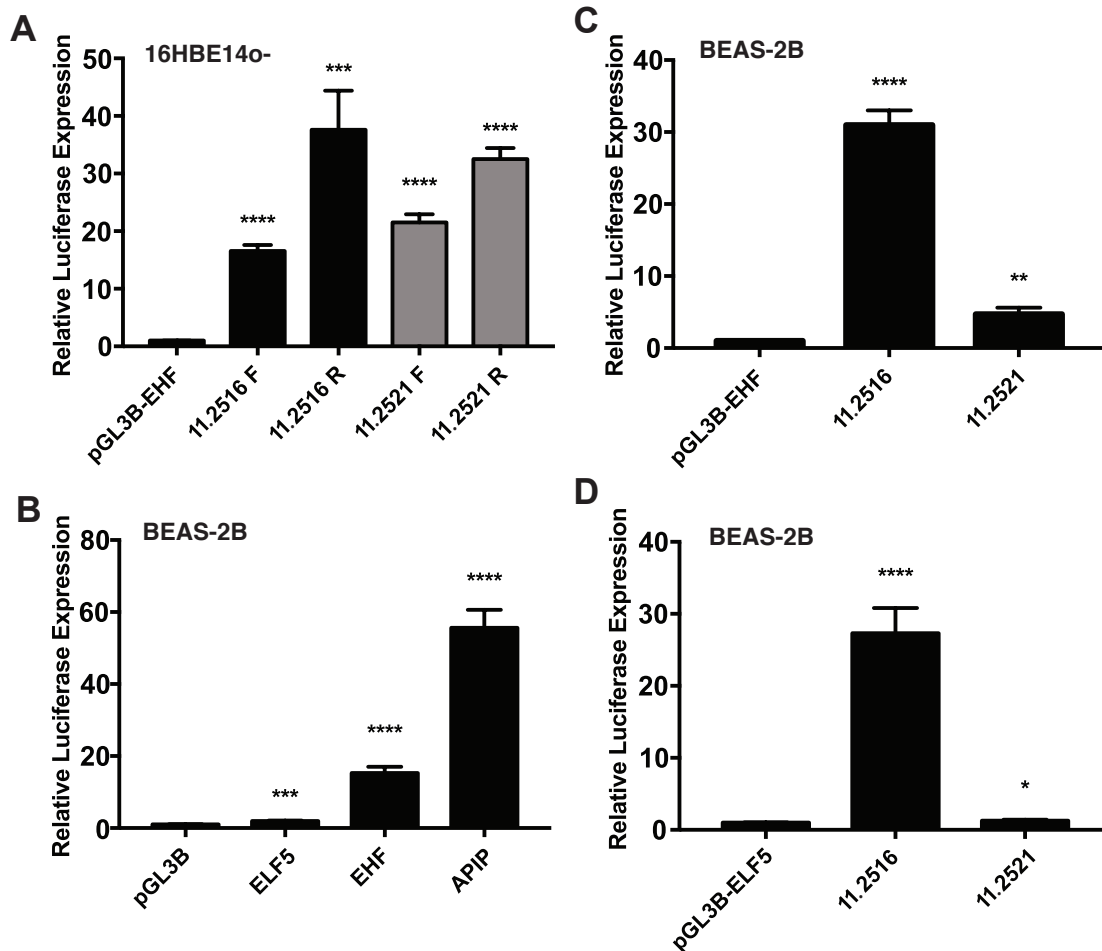

**Suppl. Fig. 3. DHS 11.2516 and 11.1521 contain classical enhancer elements which function in several airway cell lines.** A. The 11.2516 (black bars) and 11.2521 (grey bars) elements were cloned into the enhancer site of the pGL3B-*EHF* promoter vector in both the forward and reverse orientations. Constructs were transfected into 16HBE14o- cells along with a Renilla control vector and luciferase expression was measured 48 hours post-transfection. n=3. \*\*\*\*p<0.0001, \*\*\*p<0.001, \*\*p<0.01, \*p<0.05. Data show these enhancers are active in both orientations with respect to the promoter. B. The promoters for *EHF*, *ELF5*, and *APIP* were cloned into the pGL3B vector and transfected into BEAS-2B cells. Luciferase expression was measured as in (A). n=3. p-values as for (A). C. The 2516 and 2521 enhancers were cloned into the enhancer site of the pGL3B-*EHF* promoter construct and transfected into BEAS-2B cells as in (B). n=3. p-values as for (A). D. 11.2516 and 2521 inserted into the pGL3B-*ELF5* promoter construct; see (C).

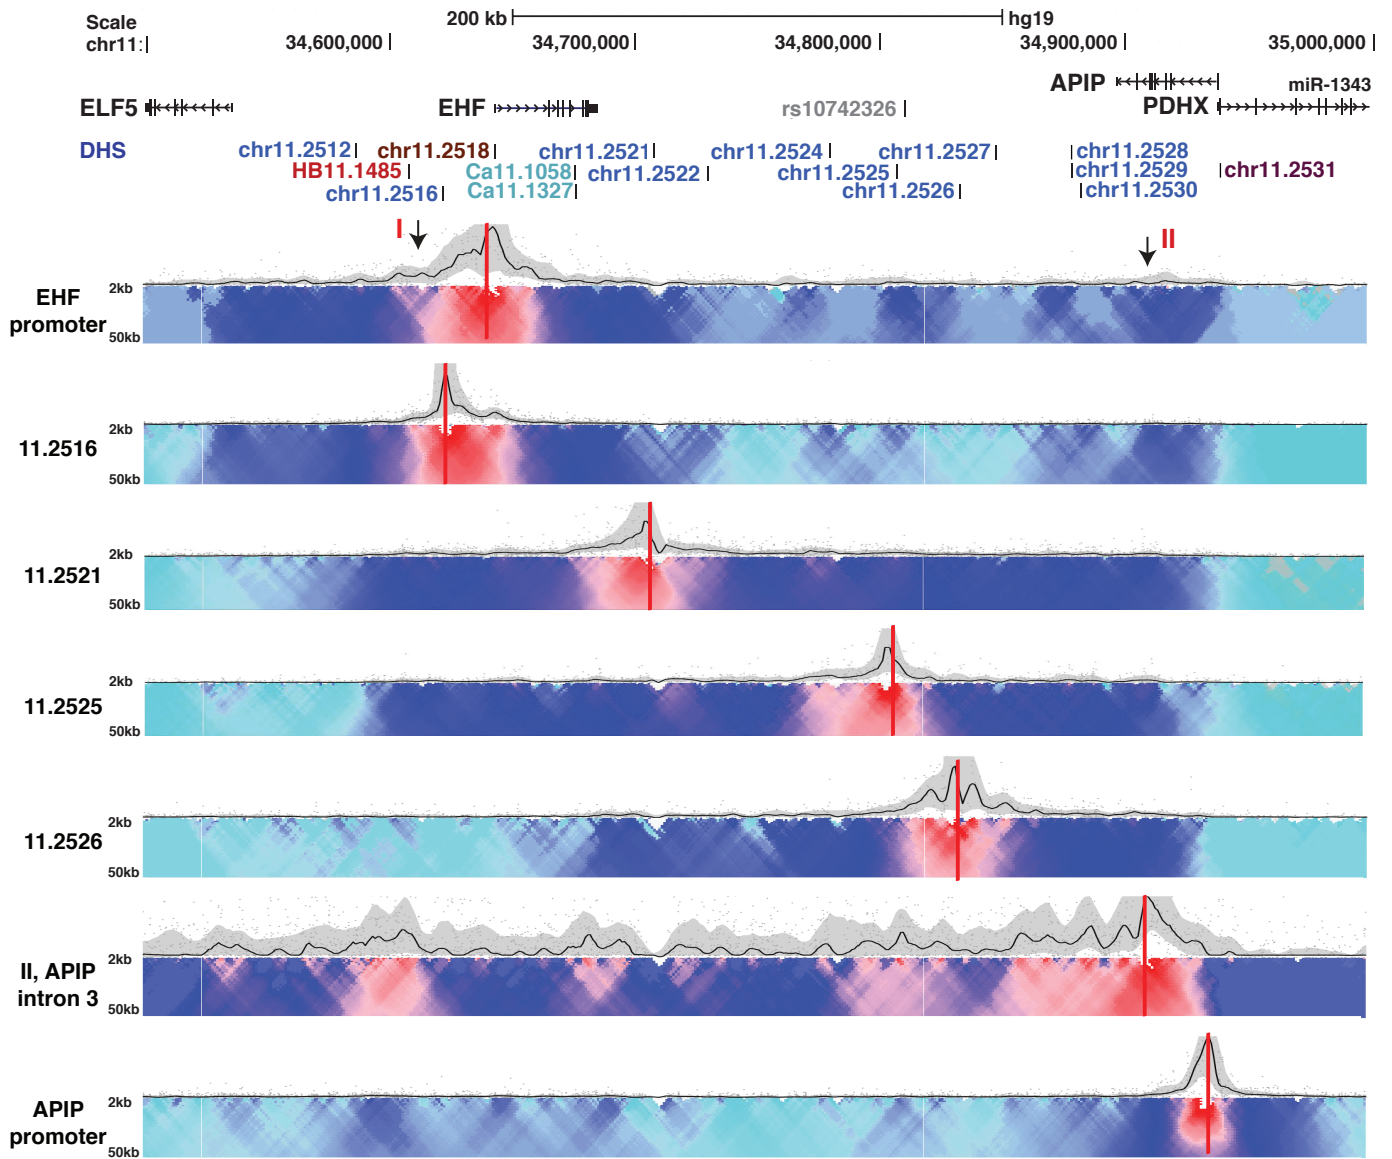

**Suppl. Fig. 4. 4C-seq from multiple viewpoints reveals the 11p13 chromosome conformation in primary HBE cells.** 4C-seq data tracks are as described in Figure 3. Viewpoints are at the *EHF* promoter, DHS 11.2516, 2521, 2525, 2526, *AP1P* intron 3, and the *AP1P* promoter. For all 4C data shown in Suppl. Figs. 4 - 6 each viewpoint was assayed twice in separate experiments to demonstrate reproducibility of interactions and one of them is shown.

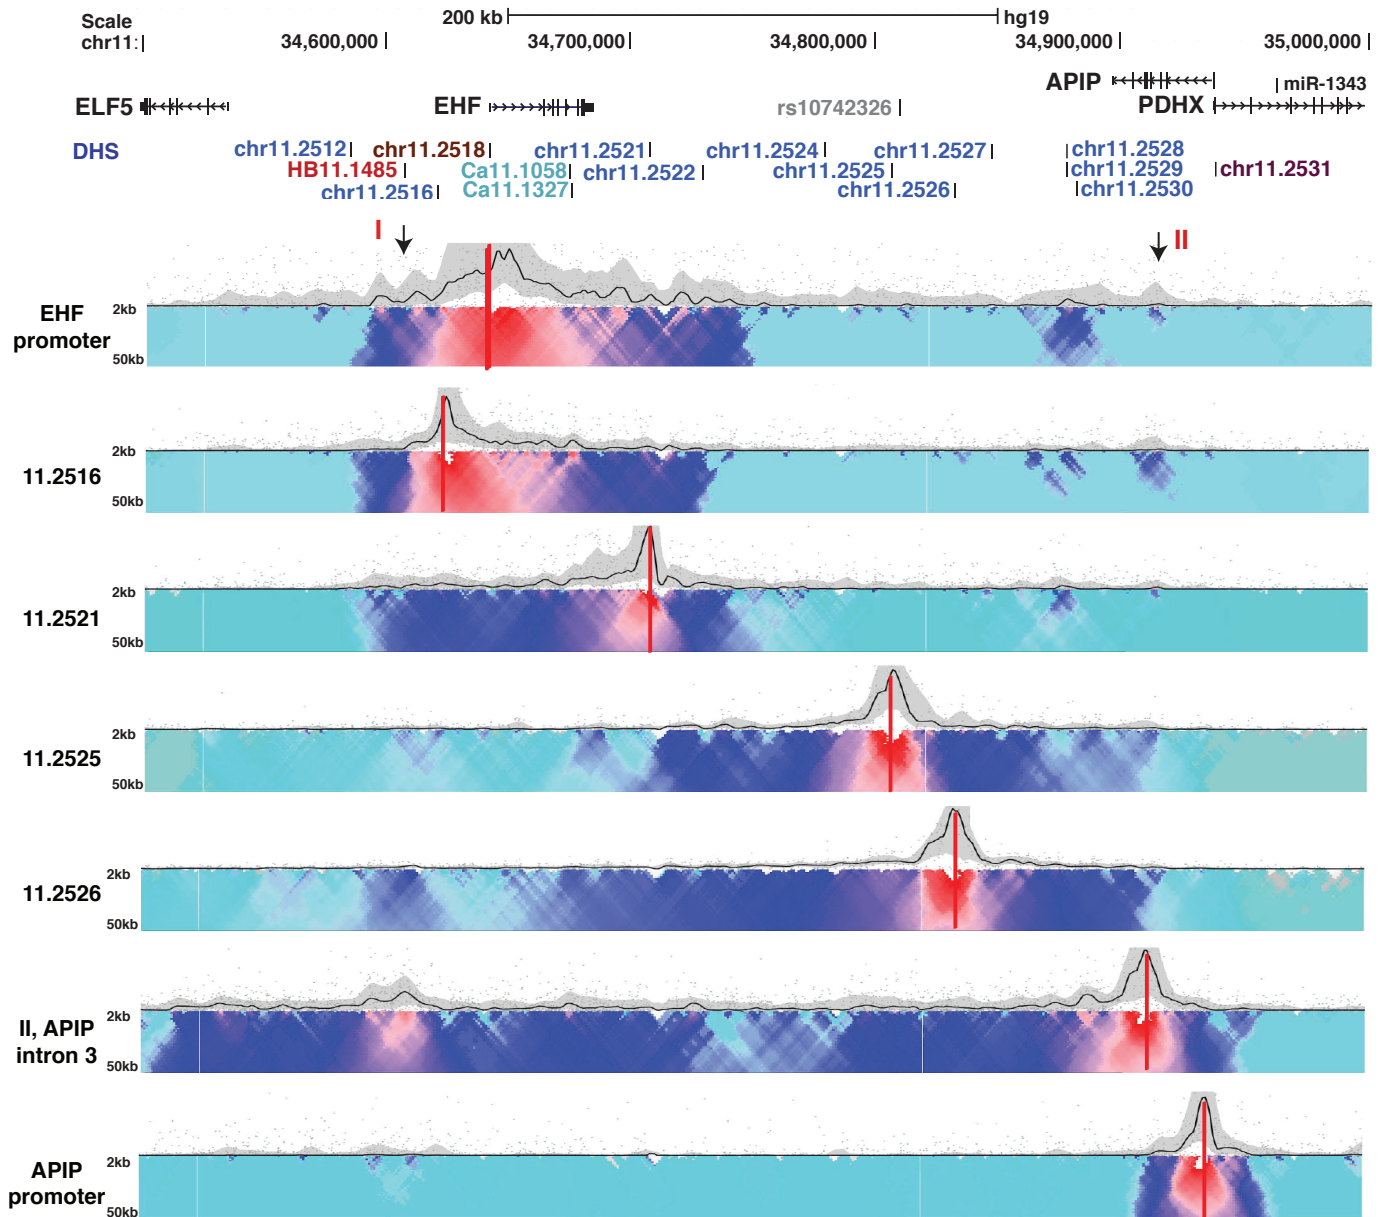

**Suppl. Fig. 5. 4C-seq from multiple viewpoints reveals the 11p13 chromosome conformation in 16HBE14o- cells.** 4C-seq data tracks are as described in Figure 3. Viewpoints are at the *EHF* promoter, DHS 11.2516, 2521, 2525, 2526, *AP1P* intron 3, and the *AP1P* promoter.

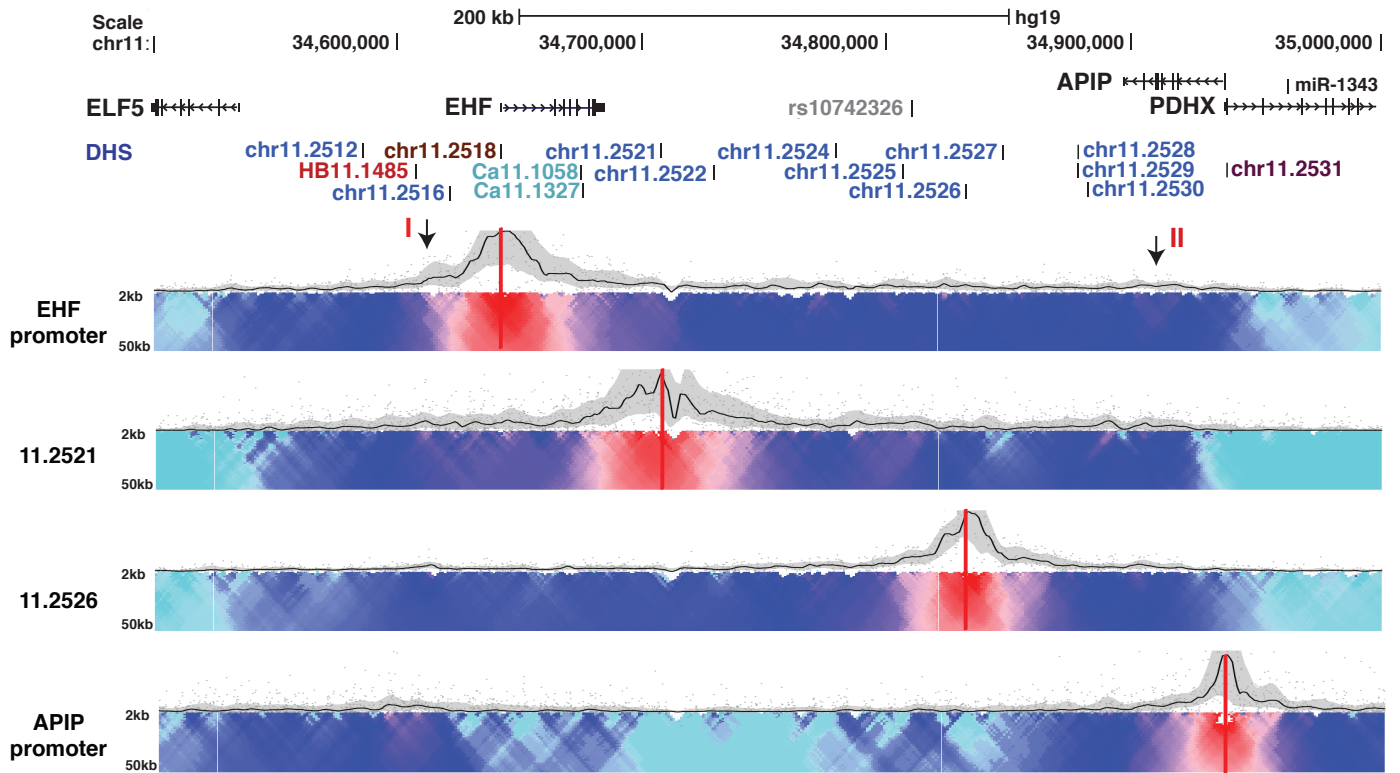

**Suppl. Fig. 6. 4C-seq from multiple viewpoints reveals the 11p13 chromosome conformation in K562 cells.** 4C-seq data tracks are as described in Figure 3. Viewpoints are at the *EHF* promoter, DHS 2521, 2526, and the *APIP* promoter.



| Region        | Forward Primer                               | Reverse Primer                               |
|---------------|----------------------------------------------|----------------------------------------------|
| ELF5 Promoter | CGGAGCTCTGACAAGATAGGCCA<br>GTGCCA            | CCCTCGAGCAGCACCAGCGTGCA<br>GTGGAA            |
| EHF Promoter  | CGGAGCTCACCTGCCCAGCTTCC<br>AAGACCTT          | CCCTCGAGGGGCACCACGGGTG<br>TTATCAAG           |
| APIP Promoter | <b>CTCGAG</b> AGCCCCACACCAGACCA<br>GACC      | <b>CTCGAG</b> ACACTTGCCCAGGAACG<br>ATCTCCA   |
| DHS 11.2516   | GCAG <b>TCGAC</b> AAAGGTCCTGTTCA<br>ACCTCTGG | GCAG <b>TCGAC</b> GTGGCCTCTCCTT<br>CATCTTTT  |
| DHS 11.2521   | <b>GGATCC</b> ACAAAGTGTCTCTCAAT<br>GAA       | <b>GGATCC</b> CCCTGTGGTCTCCAATT<br>GTA       |
| DHS 11.2522   | CG <b>GGATCC</b> AGTGAGGAAGCCAG<br>CCAGGC    | CG <b>GGATCC</b> AGACACCAGCTGGG<br>GCAGCT    |
| DHS 11.2524   | CG <b>GGATCC</b> GCCTAGGAACAATAG<br>GATGTACC | CG <b>GGATCC</b> GCACATCTTCACATC<br>TCTGAACC |
| DHS 11.2525   | <b>GGATCC</b> GGAACAGAGATGAGGTA<br>CTT       | <b>GGATCC</b> GCAATTACCACACCTCT<br>CAC       |
| DHS 11.2526   | GCAG <b>TCGAC</b> AAAGGTCCTGTTCA<br>ACCTCTGG | GCAG <b>TCGAC</b> GTGGCCTCTCCTT<br>CATCTTTT  |
| DHS 11.2527   | <b>GGATCC</b> CTTTCTCAGCAGCTTCT<br>GGT       | <b>GGATCC</b> TGAGACCACACTTGGCA<br>CCT       |
| DHS 11.2528   | CG <b>GGATCC</b> GGCGGTTCTGCTCCC<br>TTGGG    | CG <b>GGATCC</b> ACTGGAGACTGGGAA<br>AGCTG    |
| DHS 11.2529   | GC <b>GGATCC</b> GGCGAGTCACTCTTC<br>AGGTGCA  | GC <b>GGATCC</b> TGGTGCTCCCTGGAG<br>TTCTGT   |
| DHS 11.2530   | CG <b>GGATCC</b> TGCAAAGACCAGAG<br>TGCCACT   | CG <b>GGATCC</b> AAACAGCTGGGGAG<br>GGAATGCT  |

**Suppl. Table 1A: Primers used for cloning.** Bold denotes restriction enzyme site used for cloning into pGL3B.

| Region             | Forward Primer          | Reverse Primer          |
|--------------------|-------------------------|-------------------------|
| DHS 11.2512        | GCTTCTATTCATTCACCCAACAC | GTAGTAGCCCTGCCACCAGA    |
| HB11.1485 (I)      | GATTTTCCGAAGCTGTGGAGG   | CCACCATACGCAATCACAGG    |
| DHS 11.2516        | TCCTGTCTTGAAGCGACCAC    | GGCTCAGGGGAGAAGCAAAT    |
| EHF intron 6       | CCCGTAAAGAAATGGCTCAC    | AGGCCAAGGTCCTATCCAGT    |
| DHS 11.2521        | CTCAAGCCTGGAAAGCCTCA    | GCTGCATCTACCCGAGAGTC    |
| APIP +84 kb        | CTGTCATGCAAAGAATCAGGTTT | TAAGAAACTGTCCAGCAGAGGTC |
| APIP intron 2 (II) | CTGTCATGCAAAGAATCAGGTTT | TAAGAAACTGTCCAGCAGAGGTC |
| APIP intron 1      | CAAGCCAGGATGGTCTCAAT    | TCCACTAGGTGGCACTGTTG    |
| 11p13 NC           | TCCTTCCAGGTTTTGGCTCC    | GCCCCAGATCAGGAGAGAGA    |
| CFTR +48.9kb       | GGCATCAGCCAGTCAAGGTT    | AGCAGAGGGCAAAGTGGTACTT  |

**Suppl. Table 1B: Primers used for ChIP-qPCR.**



| Gene                 | Forward Primer        | Reverse Primer           |
|----------------------|-----------------------|--------------------------|
| ELF5                 | TGCTTGAAAACAAGTGGCATC | AGGGCTTCCGATTTAACCACC    |
| EHF                  | GCAGCATGAGTTTGCAGGAG  | GTGTGTGGACTGGAAACAGGT    |
| APIP                 | GGCCACACTTCTCTTTCCAG  | GCATGAGCCATTCTATCTTTGAGG |
| PDHX                 | GACATTTTCAGTGGCTGTGGC | TCGATGCCAAACATCCCCAA     |
| Beta-2-Microglobulin | CTCTCTCTTTCTGGCCTGGAG | TCTGCTGGATGACGTGAGTA     |

Suppl. Table 1C: Primers used to measure gene expression in SYBR Green qPCR assays.

| Viewpoint                   | Reading Primer                                                                          | Non-reading Primer                                    |
|-----------------------------|-----------------------------------------------------------------------------------------|-------------------------------------------------------|
| EHF Promoter                | AATGATACGGCGACCACCGAACACTCTTT<br>CCCTACACGACGCTCTTCCGATCTTTTAGT<br>CCACCCTGCTTTGG       | CAAGCAGAAGACGGGCAT<br>ACGATTAGGGCTCAGAG<br>TACACGG    |
| EHF Promoter<br>(16HBE14o-) | AATGATACGGCGACCACCGAACACTCTTT<br>CCCTACACGACGCTCTTCCGATCTATTATC<br>TGTGAATTTCTGCAT      | CAAGCAGAAGACGGGCAT<br>ACGATTTAGTCCACCCT<br>GCTTTGG    |
| APIP Promoter               | AATGATACGGCGACCACCGAACACTCTTT<br>CCCTACACGACGCTCTTCCGATCTTGTG<br>GTTTGTGTAATGACCGA      | CAAGCAGAAGACGGGCAT<br>ACGATCCCCAAATTAGC<br>AAAGACGAC  |
| HB11.1485 (I)               | AATGATACGGCGACCACCGAACACTCTTT<br>CCCTACACGACGCTCTTCCGATCTCTTGG<br>GGAGTAGCAAAGAT        | CAAGCAGAAGACGGGCAT<br>ACGATCCAAACCTCTATT<br>TCCTCA    |
| DHS 11.2516                 | AATGATACGGCGACCACCGAACACTCTTT<br>CCCTACACGACGCTCTTCCGATCTCTCCC<br>CAAATTAGCACCATG       | CAAGCAGAAGACGGGCAT<br>ACGAAGGCAGCCTTCTT<br>GCTTTCT    |
| DHS 11.2521                 | AATGATACGGCGACCACCGAACACTCTTT<br>CCCTACACGACGCTCTTCCGATCTTTTGT<br>CATTGAAGGACATCAT      | CAAGCAGAAGACGGGCAT<br>ACGATTGTCTTGGTAATT<br>TGTGAACC  |
| DHS 11.2525                 | AATGATACGGCGACCACCGAACACTCTTT<br>CCCTACACGACGCTCTTCCGATCTATGCC<br>CAAACAGTCCCATG        | CAAGCAGAAGACGGGCAT<br>ACGAGGAGGTAAGGAA<br>GGTAAGGG    |
| DHS 11.2526                 | AATGATACGGCGACCACCGAACACTCTTT<br>CCCTACACGACGCTCTTCCGATCTATGGT<br>GGGTTTAAATAAATTACAGA  | CAAGCAGAAGACGGGCAT<br>ACGAACTTGCAGGAAGC<br>CAGATTG    |
| APIP intron 3 (II)          | AATGATACGGCGACCACCGAACACTCTTT<br>CCCTACACGACGCTCTTCCGATCTCCCTC<br>TATAAATAGCCTGAAGACATG | CAAGCAGAAGACGGGCAT<br>ACGAAACCCTTGAGAAA<br>TTTAGATGGT |

Suppl. Table 1D: Primers used for 4C-seq. Red denotes Illumina P5 adapter sequence and blue denotes Illumina P7 adapter sequence used for library generation.
